# Supplementary material for: The hope and hype of ellagic acid and urolithins as ligands of SARS-CoV-2 Nsp5 and inhibitors of viral replication
Source: PubMed Central journal article supplement — J Enzyme Inhib Med Chem. 2023 Aug 28;38(1):2251721. doi: 10.1080/14756366.2023.2251721 (PMC10464554; doi:10.1080/14756366.2023.2251721), 2023-08-28

## Table of Contents:

**Table S1.** Inflection temperature values ( $T_i$ ) of recombinant Nps5 protein after time of incubation (48 h) and upon labelling reaction as determined using nano-DSF assays.

**Table S2.** GScores (kcal/mol) of top scored poses of compounds **2**, **7-11** from six independent docking calculations.

**Figure S1.** Thermal stability of recombinant Nps5 (protein concentration: 3.4  $\mu$ M) in Tris buffer (20 mM Tris, 140mM NaCl, pH 8) freshly prepared (0 minutes) and after 48 h incubation in dark at +4°C. The experiment was carried out using nano-DSF with Tycho NT.6 instrument.

**Figure S2.** Thermal stability of recombinant Nps5 (protein concentration: 3.4  $\mu$ M) in Tris buffer (20 mM Tris, 140mM NaCl, pH 8) before (wild type Mpro) and after the labelling reaction (red Mpro). The experiment was carried out using nano-DSF with Tycho NT.6 instrument.

**Figure S3.** MST binding curve of nirmatrelvir (**1**) against the main protease Nsp5. The curve is obtained plotting the normalized fluorescence variation ( $\Delta F_{norm}$ ) vs ligand concentration (M).

**Figure S4.** MST binding curve of ellagic acid (**7**) against the main protease Nsp5. The curve is obtained plotting the initial fluorescence change (Raw Fluorescence) vs ligand concentration (M).

**Figure S5.** MST binding curve of urolithin A (**8**) against the main protease Nsp5. The curve is obtained plotting the initial fluorescence change (Raw Fluorescence) vs ligand concentration (M).

**Figure S6.** MST binding curve of urolithin B (**9**) against the main protease Nsp5. The curve is obtained plotting the initial fluorescence change (Raw Fluorescence) vs ligand concentration (M).

**Figure S7.** MST binding curve of urolithin C (**10**) against the main protease Nsp5. The curve is obtained plotting the initial fluorescence change (Raw Fluorescence) vs ligand concentration (M).

**Figure S8.** MST binding curve of urolithin D (**11**) against the main protease Nsp5. The curve is obtained plotting the initial fluorescence change (Raw Fluorescence) vs ligand concentration (M).

**Table S1.**

| <b>Protein Sample</b>              | <b>T<sub>i</sub> (°C)</b> |
|------------------------------------|---------------------------|
| Nsp5 (wild type Mpro)              | 60.1 ± 0.1                |
| Nsp5 (wild type Mpro) – after 48 h | 60.3 ± 0.1                |
| NT650-Nps5 (red Mpro)              | 60.3 ± 0.1                |

**Table S2.**

| <b>Compound</b>           | <b>GScore<br/>(kcal/mol)<br/>Replica #1</b> | <b>GScore<br/>(kcal/mol)<br/>Replica #2</b> | <b>GScore<br/>(kcal/mol)<br/>Replica #3</b> | <b>GScore<br/>(kcal/mol)<br/>Replica #4</b> | <b>GScore<br/>(kcal/mol)<br/>Replica #5</b> | <b>GScore<br/>(kcal/mol)<br/>Replica #6</b> | <b>Mean <math>\pm</math> st. dev.</b> |
|---------------------------|---------------------------------------------|---------------------------------------------|---------------------------------------------|---------------------------------------------|---------------------------------------------|---------------------------------------------|---------------------------------------|
| Myricetin ( <b>2</b> )    | -7.073                                      | -7.073                                      | -7.073                                      | -7.073                                      | -7.073                                      | -7.073                                      | -7.073 $\pm$ 0.000                    |
| Ellagic Acid ( <b>7</b> ) | -6.085                                      | -6.085                                      | -6.085                                      | -6.085                                      | -6.085                                      | -6.085                                      | -6.085 $\pm$ 0.000                    |
| Urolithin A ( <b>8</b> )  | -6.343                                      | -6.462                                      | -6.462                                      | -6.462                                      | -6.462                                      | -6.462                                      | -6.44217 $\pm$<br>0.04858             |
| Urolithin B ( <b>9</b> )  | -5.739                                      | -5.739                                      | -5.739                                      | -5.739                                      | -5.739                                      | -5.739                                      | -5.739 $\pm$ 0.000                    |
| Urolithin C ( <b>10</b> ) | -6.082                                      | -6.081                                      | -6.081                                      | -6.081                                      | -6.081                                      | -6.081                                      | -6.08117 $\pm$<br>0.00041             |
| Urolithin D ( <b>11</b> ) | -6.520                                      | -6.518                                      | -6.518                                      | -6.518                                      | -6.518                                      | -6.518                                      | -6.51833 $\pm$<br>0.00082             |

Figure S1.

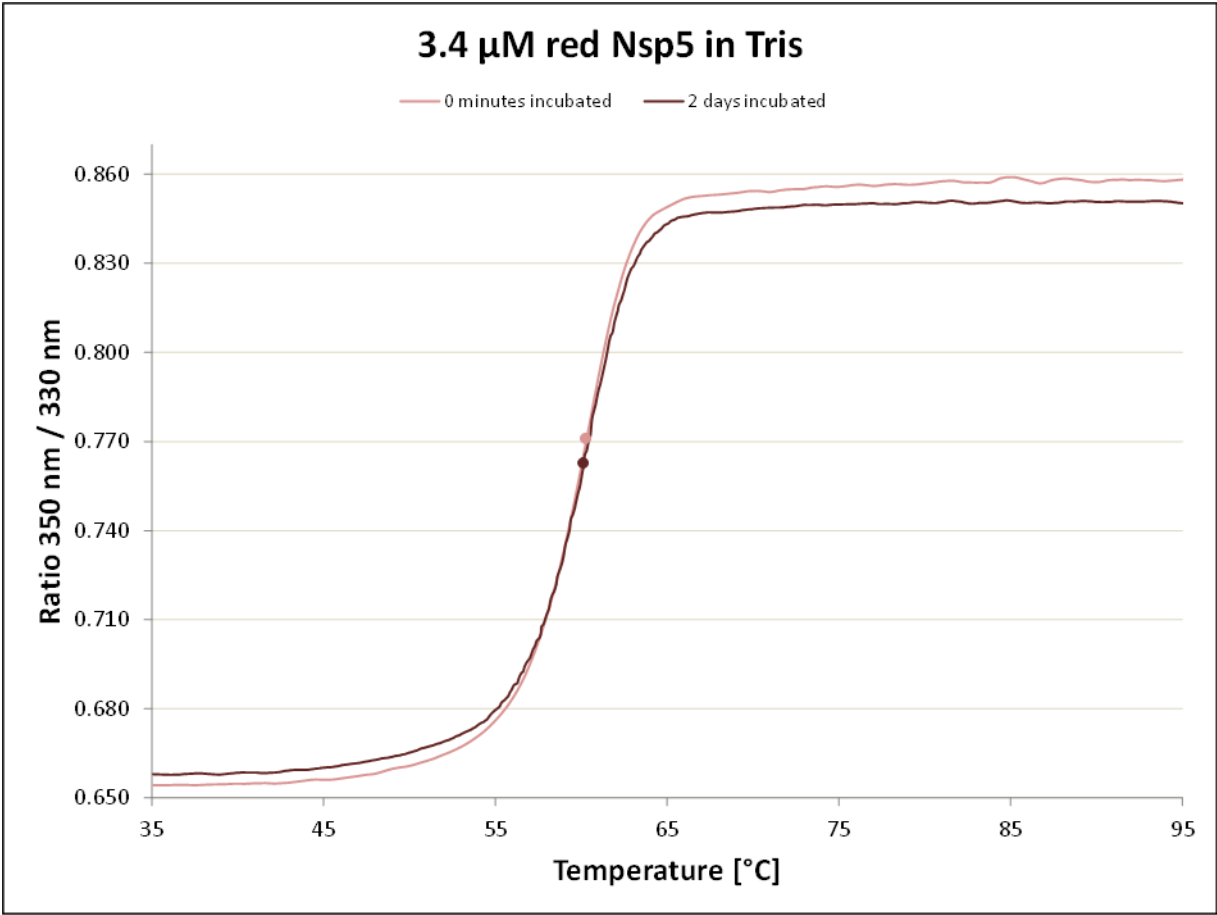

Figure S2.

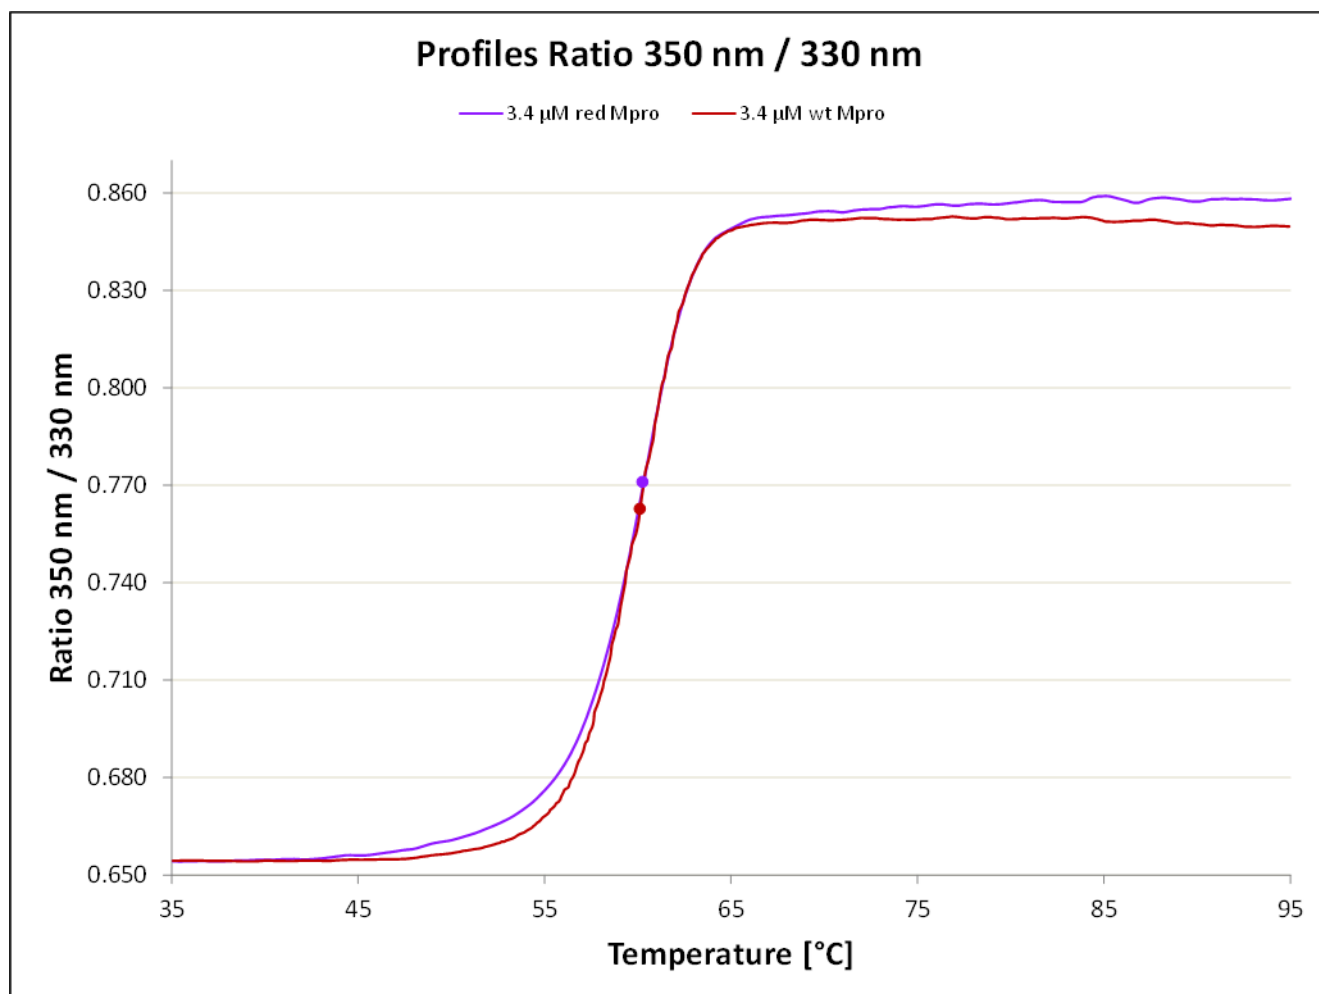

Figure S3.

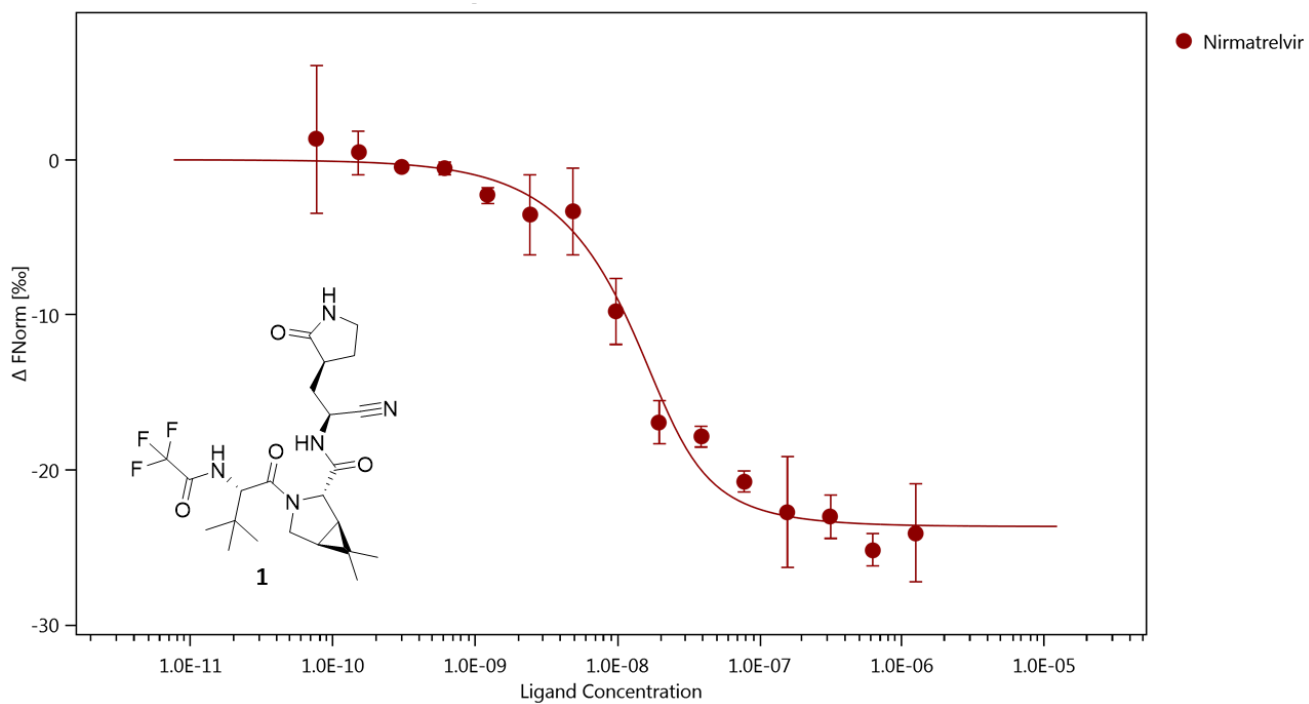

Figure S4.

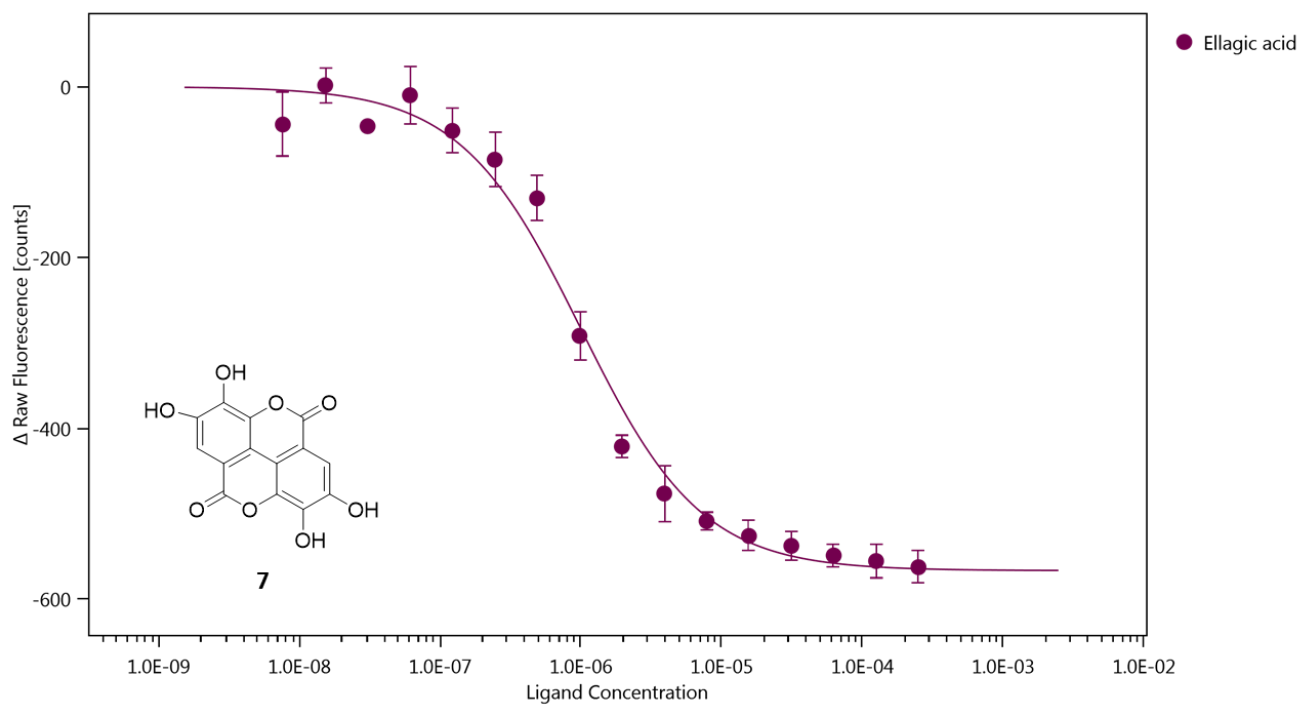

**Figure S5.**

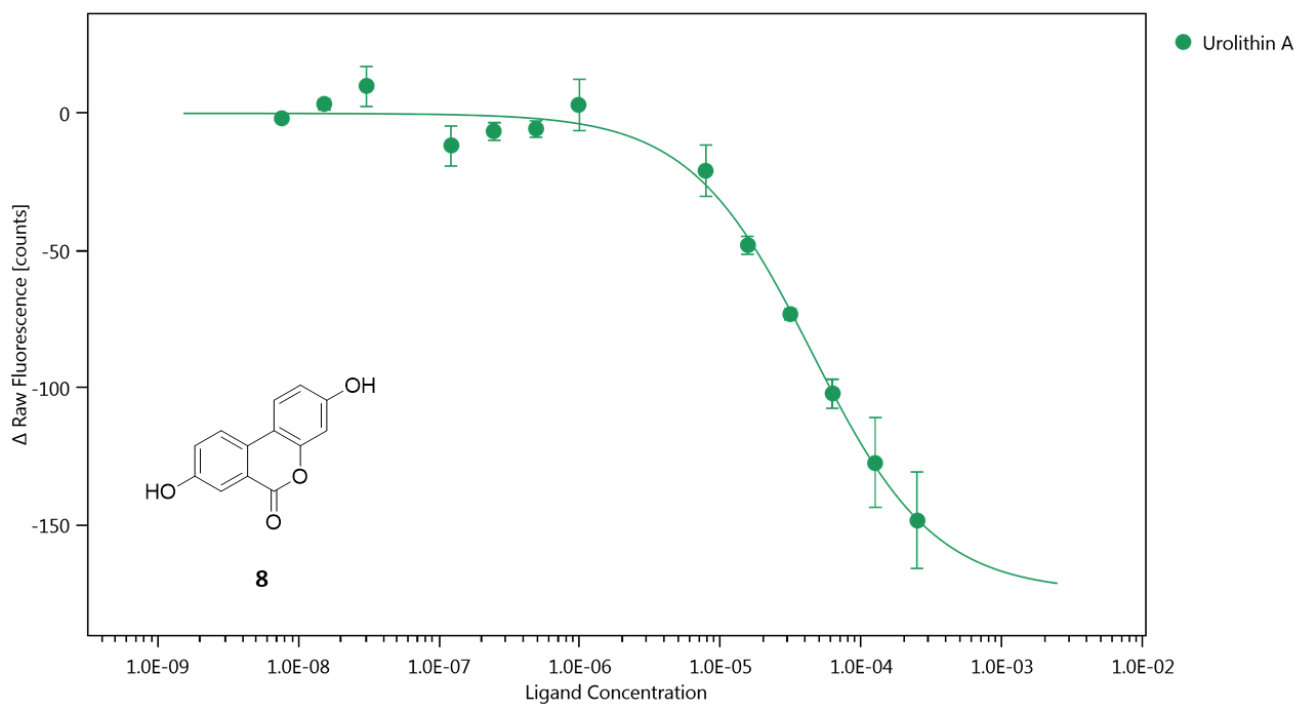



**Figure S6.**

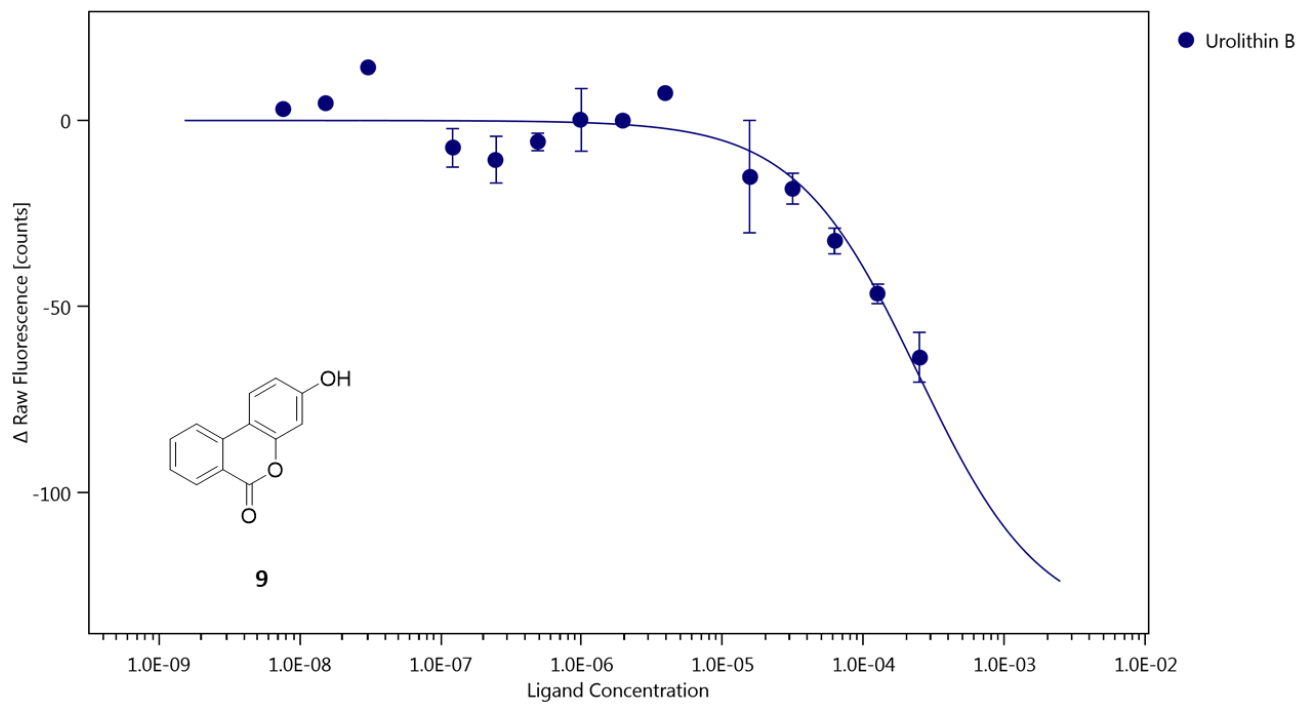

Figure S7.

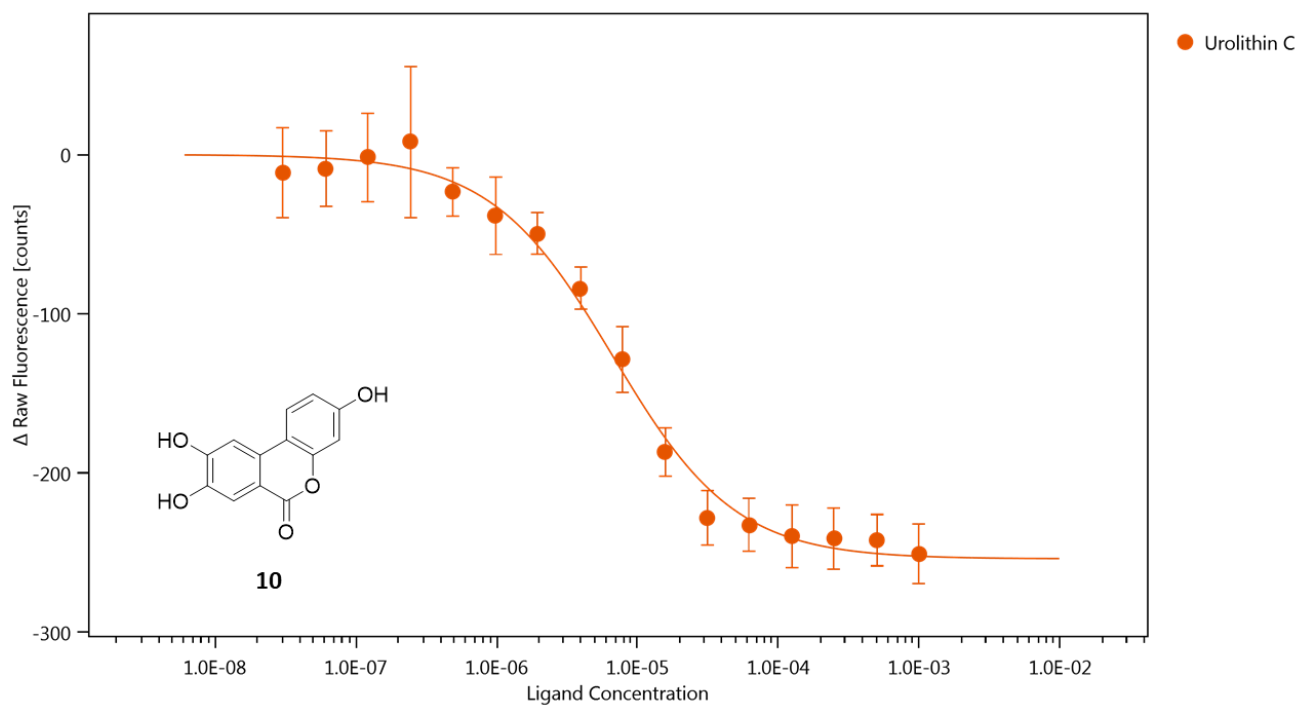

**Figure S8.**

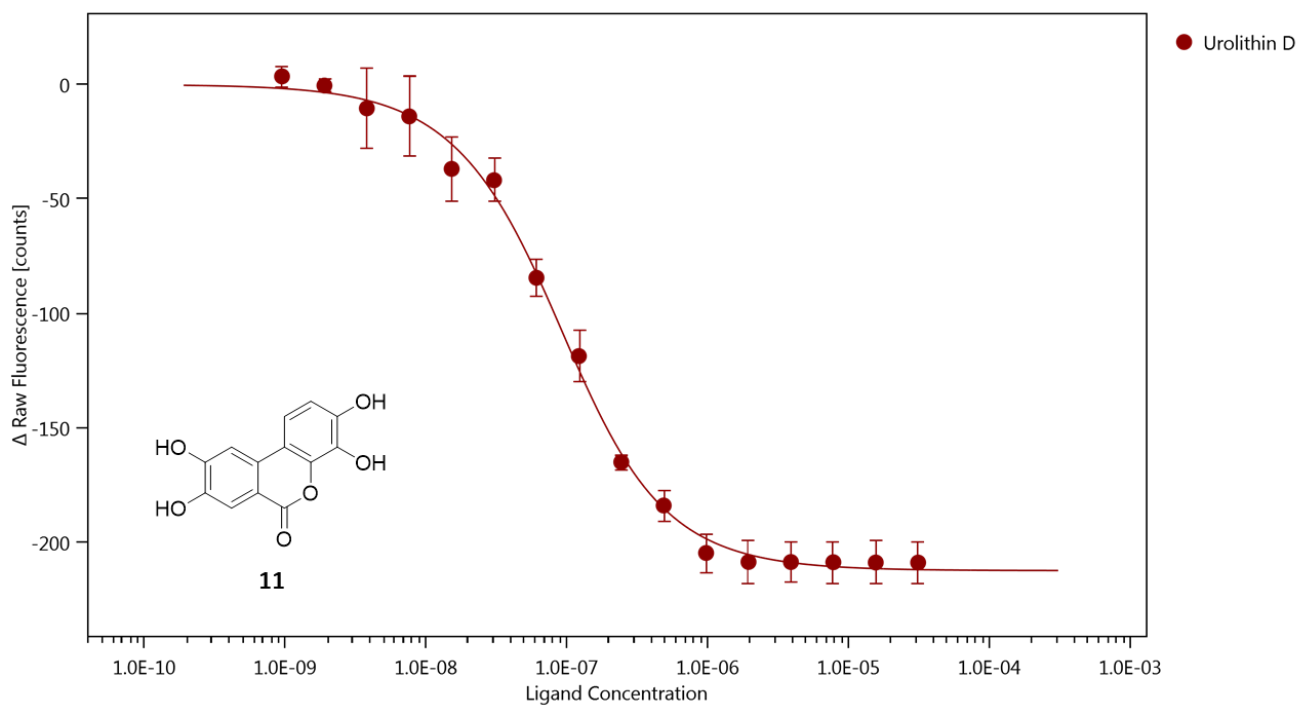

Supplement: IENZ_A_2251721_SM8553.pdf [file IENZ_A_2251721_SM8553.pdf]
